# Supplementary material
Source: PubMed Central journal article supplement (PMC3187528)
Supplement: supp_mol.111.072249_72249_supplemental_Figure_2.pdf [file supp_mol.111.072249_72249_supplemental_Figure_2.pdf]

## Supplemental Figure 2

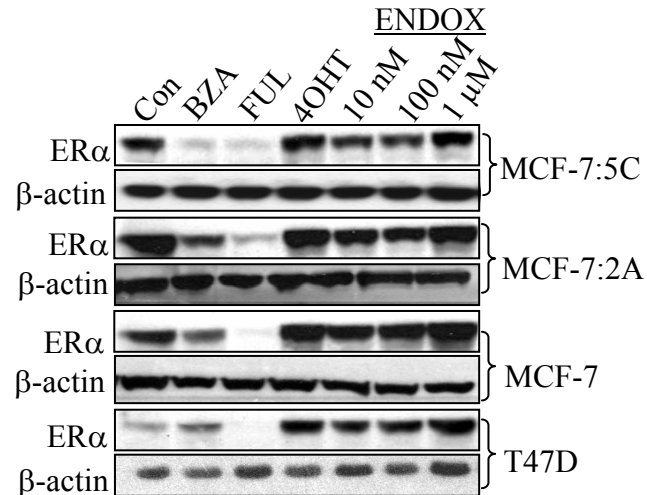

### **The Selective Estrogen Receptor Modulator Bazedoxifene Inhibits Hormone-Independent Breast Cancer Cell Growth and Downregulates Estrogen Receptor $\alpha$ and Cyclin D1.**

**Joan S Lewis-Wambi, Helen Kim, Ramona Curpan, Ronald Grigg, Mohammed A. Sarker, and V. Craig Jordan.**  
**Molecular Pharmacology.**

Effect of endoxifen on ER $\alpha$  protein expression in MCF-7:5C, MCF-7, T47D, and MCF-7:2A breast cancer cells. The indicated cells were treated with 0.01, 0.1, and 1  $\mu$ M endoxifen for 24 hours and protein lysates were prepared and analyzed for ER $\alpha$  expression. For comparison, cells were also treated with 1  $\mu$ M BZA, FUL, or 4OHT for a similar time point.  $\beta$ -actin was used as an internal control to verify equal protein loading. Each blot is representative of 3 independent experiments and from a single exposure.
