# Supplementary material
Source: PubMed Central journal article supplement (PMC3187528)
Supplement: supp_mol.111.072249_72249_supplemental_Figure_3.pdf [file supp_mol.111.072249_72249_supplemental_Figure_3.pdf]

### Supplemental Figure 3

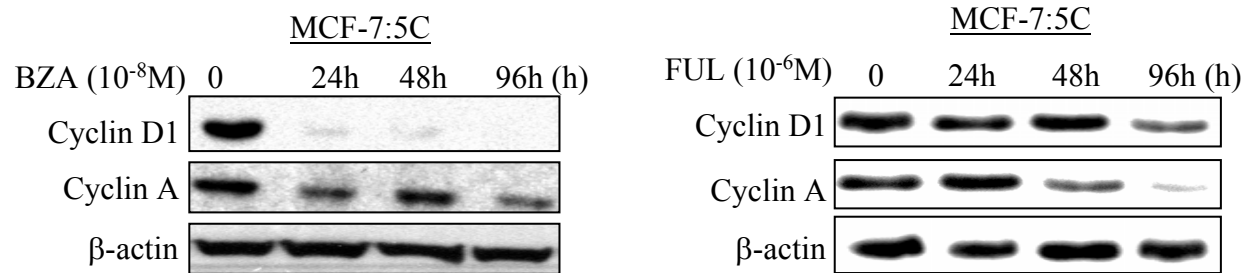

### The Selective Estrogen Receptor Modulator Bazedoxifene Inhibits Hormone-Independent Breast Cancer Cell Growth and Downregulates Estrogen Receptor $\alpha$ and Cyclin D1.

Joan S Lewis-Wambi, Helen Kim, Ramona Curpan, Ronald Grigg, Mohammed A. Sarker, and V. Craig Jordan.

#### Molecular Pharmacology

Effect of BZA and FUL on cyclin protein expression in

MCF-7:5C cells. Cells were treated with either 10<sup>-8</sup> M BZA or 10<sup>-6</sup> M FUL for 24, 48, and 96 hours and protein lysates were prepared and analyzed for cyclin D1 and cyclin A protein expression.  $\beta$ -actin was used as an internal control to verify equal protein loading. Each blot is representative of 3 independent experiments and from a single exposure.
