# Supplementary material
Source: PubMed Central journal article supplement (PMC3187528)
Supplement: supp_mol.111.072249_72249_supplemental_Figure_4.pdf [file supp_mol.111.072249_72249_supplemental_Figure_4.pdf]

## Supplemental Figure 4

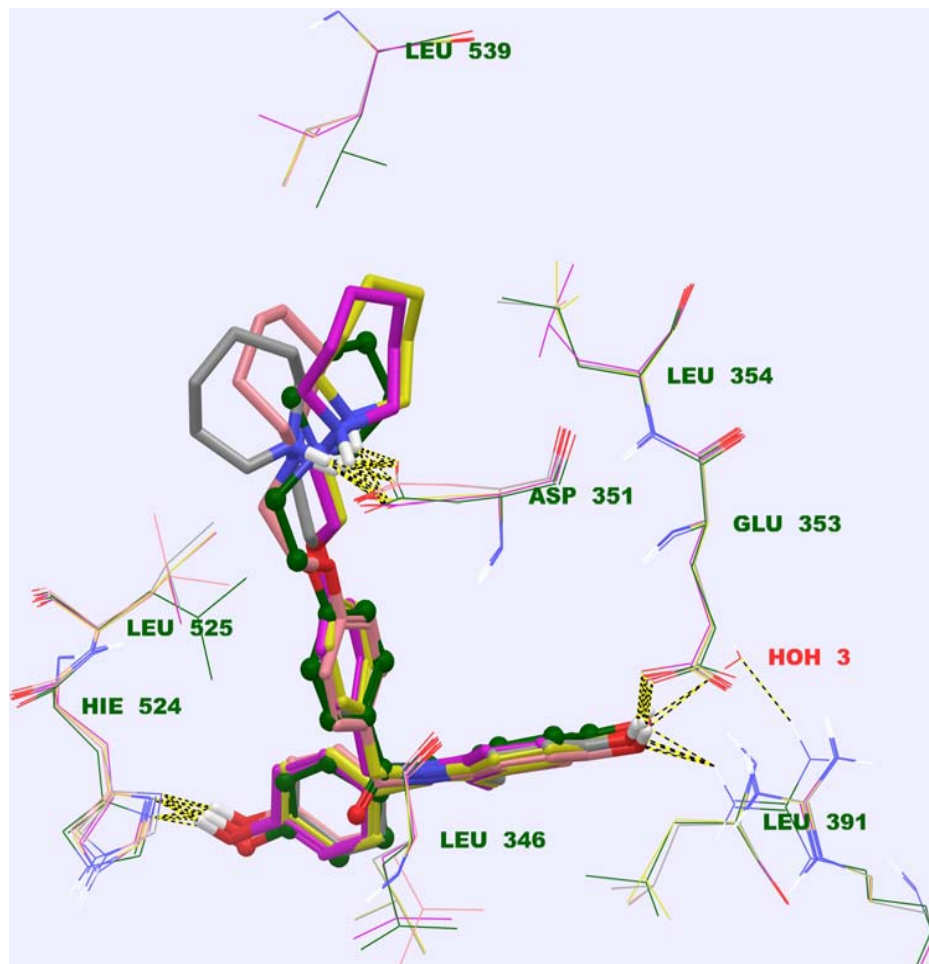

**The Selective Estrogen Receptor Modulator Bazedoxifene Inhibits Hormone-Independent Breast Cancer Cell Growth and Downregulates Estrogen Receptor  $\alpha$  and Cyclin D1.**

**Joan S Lewis-Wambi, Helen Kim, Ramona Curpan, Ronald Grigg, Mohammed A. Sarker, and V. Craig Jordan**

**Molecular Pharmacology.** Flexible docking simulation performed with the Induced Fit protocol (IFD) method. The top ranked docking poses of BZA at the binding site of ER $\alpha$  are displayed. The experimental structure of ER $\alpha$  co-crystallized with RAL (1err) is depicted in dark green, while the top ranked IFD poses of the BZA-ER $\alpha$  complex are displayed with carbons colored in gray, light pink, yellow and purple, respectively
